# Supplementary material
Source: publisher figshare collection journal article supplement (https://gsajournals.figshare.com/ndownloader/files/10821998)
Supplement: Supplementary file 1 [file 10821998]

Table S4 – Plasmid list.

| pDL | Construct details | Reference |
| --- | --- | --- |
| 1755 | 2µm, STN1, LEU2 | pVL1066 (Gasparyan et al. 2009) |
| 1756 | 2µm, LEU2 (vector for pDL1755) | YEplac181 (Gasparyan et al. 2009) |

Gasparyan HJ, Xu L, Petreaca RC, Rex AE, Small VY, Bhogal NS, Julius JA, Warsi TH, Bachant J, Aparicio OM et al. 2009. Yeast telomere capping protein Stn1 overrides DNA replication control through the S phase checkpoint. *Proc Natl Acad Sci U S A* **106**: 2206-2211.
